# Supplementary material for: Local mucosal immunization of self-assembled nanofibers elicits robust antitumor effects in an orthotopic model of mouse genital tumors
Source: Royal Society of Chemistry journal article supplement (doi:10.1039/c9nr10334a), 2020-01-01
Supplement: c9nr10334a1.pdf [file c9nr10334a1.pdf]

## Electronic Supplementary Information

### Local mucosal immunization of self-assembled nanofibers elicits robust antitumor effects in an orthotopic model of mouse genital tumors

Sijin Li<sup>a,b</sup>, Wenbing Zhu<sup>a,b</sup>, Chao Ye<sup>a,b</sup>, Wenjia Sun<sup>a,b</sup>, Hanghang Xie<sup>a,b</sup>, Xu Yang<sup>a,b</sup>, Qishu Zhang<sup>a,b</sup>, Yanbing Ma<sup>a,b</sup>

a. Laboratory of Molecular Immunology, Institute of Medical biology, Chinese Academy of medical Science & Peking Union Medical College

b. Yunnan Key Laboratory of Vaccine Research & Development on Severe Infectious Disease, Kunming, People's Republic of China

Email: [yanbingma@126.com](mailto:yanbingma@126.com)

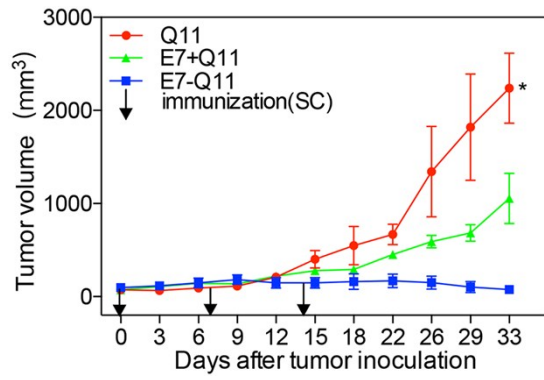

Fig. S1 Therapeutic immunization with E7-Q11 nanofibers more significantly suppressed grafted TC-1 tumor growth than the mixture of E7 peptides and Q11 nanofibers in mice.
